# Supplementary material
Source: publisher figshare collection journal article supplement (https://gsajournals.figshare.com/ndownloader/files/24101471)
Supplement: Supplementary file 1 [file 24101471]

## Sheet: S1
Suppl. Table 1. Dictyostelium discoideum genome-wide base substitution and inserion-deletion (indel) summary statistics
MA Line						Substitutions												Indels					Total sites	Gen.	Sites×Gen	Base-sub Rate	Indel Rate		CG SitesxGen	AT SitesxGen
	Coverage	A sites	C sites	G sites	T sites	Transitions				Transversions								Ins.		Del.		Ts/Tv*
						GC>AT		AT>GC		AT>TA		GC>TA		AT>CG		GC>CG
L1	48.3	9024749	3130930	3120612	9010959	1	9.10419e-11	0	0	0	0	0	0	0	0	0	0	1	2.34342e-11	0	0		24287250	1757	42672698250	2.34342e-11	2.34342e-11		10983959294	31688738956
L3	42	9018115	3129881	3119534	9005098	1	9.1857e-11	0	0	0	0	0	0	0	0	0	0	1	2.36502e-11	4	9.46009e-11		24272628	1742	42282917976	2.36502e-11	1.18251e-10		10886480930	31396437046
L9	45.4	9023240	3130508	3119891	9009499	1	7.32219e-11	1	2.53797e-11	0	0	2	1.46444e-10	0	0	1	7.32219e-11	3	5.65412e-11	4	7.53883e-11	0.666667	24283138	2185	53058656530	9.42353e-11	1.31929e-10		13657121815	39401534715
L11	28.1	9012652	3129288	3119022	8999742	0	0	0	0	0	0	1	8.36172e-11	0	0	0	0	0	0	2	4.3071e-11	0	24260704	1914	46434987456	2.15355e-11	4.3071e-11		11959265340	34475722116
L14	24.3	9010368	3127695	3117272	8996808	0	0	0	0	0	0	0	0	0	0	0	0	0	0	2	4.30862e-11		24252143	1914	46418601702	0	4.30862e-11		11952866838	34465734864
L15	64.8	9020471	3128623	3118236	9007386	0	0	0	0	0	0	1	7.94838e-11	0	0	0	0	1	2.04544e-11	10	2.04544e-10	0	24274716	2014	48889278024	2.04544e-11	2.24998e-10		12581174026	36308103998
L16	56.1	9028681	3131766	3121455	9015246	0	0	0	0	0	0	1	8.35515e-11	0	0	0	0	0	0	0	0	0	24297148	1914	46504741272	2.15032e-11	0		11968664994	34536076278
L17	43	9017377	3127521	3117040	9004762	0	0	0	0	0	0	0	0	0	0	0	0	0	0	1	2.15302e-11		24266700	1914	46446463800	0	2.15302e-11		11952089754	34494374046
L20	27.1	9014496	3129677	3119414	9000867	0	0	1	3.01347e-11	0	0	0	0	0	0	0	0	0	0	0	0		24264454	1842	44695124268	2.23738e-11	0		11510825622	33184298646
L21	36.5	9013252	3129388	3119106	9000794	0	0	0	0	0	0	0	0	0	0	0	0	0	0	2	4.30677e-11		24262540	1914	46438501560	0	4.30677e-11		11959617516	34478884044
L23	33	9013925	3127901	3117736	9000000	0	0	0	0	1	2.90035e-11	0	0	0	0	0	0	0	0	2	4.3073e-11	0	24259562	1914	46432801668	2.15365e-11	4.3073e-11		11954149218	34478652450
L24	55.5	9027650	3131107	3120634	9014068	0	0	0	0	0	0	0	0	0	0	0	0	0	0	0	0		24293459	1828	44408443052	0	0		11428182548	32980260504
L25	47.1	9025156	3130378	3120161	9011807	0	0	1	3.13053e-11	1	3.13053e-11	0	0	0	0	0	0	0	0	2	4.64974e-11	1	24287502	1771	43013166042	4.64974e-11	4.64974e-11		11069704569	31943461473
L50	29.9	8831548	3109626	3099298	8817306	0	0	0	0	0	0	1	6.06167e-11	0	0	0	0	0	0	4	6.31013e-11	0	23857778	2657	63390116146	1.57753e-11	6.31013e-11		16497111068	46893005078
L52	25.7	8972827	3125331	3115046	8959666	0	0	0	0	0	0	1	7.28394e-11	0	0	0	0	1	1.8804e-11	2	3.76079e-11	0	24172870	2200	53180314000	1.8804e-11	5.64119e-11		13728829400	39451484600
L53	29.4	8914821	3119276	3108771	8900664	0	0	0	0	0	0	0	0	0	0	0	0	1	1.72292e-11	5	8.61459e-11		24043532	2414	58041086248	0	1.03375e-10		15034505458	43006580790
L54	44.8	8989358	3123615	3113358	8976216	0	0	0	0	1	2.33384e-11	0	0	0	0	0	0	1	1.73241e-11	5	8.66205e-11	0	24202547	2385	57723074595	1.73241e-11	1.03945e-10		14875180605	42847893990
L55	30.7	8972742	3126251	3115950	8957623	1	7.84525e-11	0	0	4	1.09248e-10	0	0	0	0	0	0	3	6.07775e-11	5	1.01296e-10	0.25	24172566	2042	49360379772	1.01296e-10	1.62073e-10		12746574442	36613805330
L56	60.3	8993964	3127596	3117573	8982361	0	0	0	0	0	0	0	0	0	0	0	0	0	0	1	1.66139e-11		24221494	2485	60190412590	0	1.66139e-11		15519244965	44671167625
Mutation rate						4	1.65108e-11	3	4.30221e-12	7	1.00385e-11	7	2.88939e-11	0	0	1	4.1277e-12	12	1.27716e-11	51	5.42795e-11	0.466667				2.34147e-11	6.70511e-11		4.54047e-11	4.30221e-12
Lower limit							4.09849e-12		1.37139e-12		2.84482e-12		1.23919e-11				4.11388e-12		6.40147e-12		3.72593e-11					1.25332e-11	4.37757e-11
Upper limit							3.35037e-11		1.02359e-11		3.52223e-11		5.20791e-11				3.66899e-11		2.41873e-11		7.97227e-11					4.0626e-11	9.70313e-11
SEM**							8.08417e-12		2.49885e-12		6.00749e-12		1.02774e-11		0		3.85378e-12		4.31968e-12		1.13535e-11					6.63149e-12	1.39232e-11		9.19556e-12	1.82206e-12
QS4	28.5	12083892	3475959	3464179	12062912	0	0	0	0	1	4.14133e-11	0	0	0	0	0	0	0	0	0	0	0	31086942	1000	31086942000	3.21678e-11	0		6940138000	24146804000
QS10	22.6	12094972	3478766	3466892	12071962	0	0	0	0	0	0	0	0	0	0	0	0	0	0	1	3.21413e-11		31112592	1000	31112592000	0	3.21413e-11		6945658000	24166934000
QS12	33.3	12099404	3479721	3467940	12075865	0	0	0	0	0	0	0	0	0	0	0	0	0	0	0	0		31122930	1000	31122930000	0	0		6947661000	24175269000
QS14	44.7	12092594	3477089	3465298	12070791	1	1.44043e-10	0	0	1	4.13849e-11	1	1.44043e-10	0	0	0	0	1	3.21484e-11	0	0	0.5	31105772	1000	31105772000	9.64451e-11	3.21484e-11		6942387000	24163385000
QS20	20.7	12096891	3479590	3467753	12073245	0	0	0	0	2	8.27467e-11	0	0	0	0	0	0	0	0	0	0	0	31117479	1000	31117479000	6.42726e-11	0		6947343000	24170136000
QS24	43.1	12101535	3480576	3468728	12078390	1	1.43899e-10	0	0	1	4.13566e-11	1	1.43899e-10	0	0	0	0	0	0	0	0	0.5	31129229	1000	31129229000	9.63724e-11	0		6949304000	24179925000
QS30	25.6	12080157	3474804	3462933	12059717	0	0	0	0	0	0	0	0	0	0	1	1.44139e-10	0	0	1	3.21775e-11	0	31077611	1000	31077611000	3.21775e-11	3.21775e-11		6937737000	24139874000
QS36	35.5	12101208	3480511	3468685	12078075	0	0	0	0	0	0	0	0	0	0	0	0	0	0	0	0		31128479	1000	31128479000	0	0		6949196000	24179283000
QS40	24.1	12098362	3479928	3468016	12075300	0	0	0	0	0	0	0	0	0	0	0	0	0	0	0	0		31121606	1000	31121606000	0	0		6947944000	24173662000
QS44	39.4	12099577	3479817	3467987	12076050	0	0	0	0	0	0	0	0	0	0	0	0	0	0	0	0		31123431	1000	31123431000	0	0		6947804000	24175627000
QS50	33.5	12099323	3479732	3467901	12075769	0	0	0	0	0	0	0	0	0	0	0	0	1	3.21309e-11	2	6.42617e-11		31122725	1000	31122725000	0	9.63926e-11		6947633000	24175092000
QS54	31.6	12100958	3480427	3468614	12077861	1	1.43905e-10	0	0	0	0	0	0	0	0	0	0	0	0	2	6.42511e-11		31127860	1000	31127860000	3.21256e-11	6.42511e-11		6949041000	24178819000
QS60	38	12101354	3480540	3468700	12078254	0	0	0	0	0	0	0	0	0	0	0	0	0	0	1	3.21245e-11		31128848	1000	31128848000	0	3.21245e-11		6949240000	24179608000
QS64	42.1	12097647	3479369	3467469	12074328	0	0	0	0	0	0	0	0	1	4.13702e-11	0	0	0	0	0	0	0	31118813	1000	31118813000	3.21349e-11	0		6946838000	24171975000
QS68	26.7	12100108	3480148	3468363	12076834	0	0	0	0	0	0	0	0	0	0	0	0	0	0	0	0		31125453	1000	31125453000	0	0		6948511000	24176942000
QS70	39.3	12101380	3480562	3468711	12078310	0	0	0	0	0	0	0	0	0	0	0	0	0	0	1	3.21244e-11		31128963	1000	31128963000	0	3.21244e-11		6949273000	24179690000
QS74	20.8	12063300	3471598	3459936	12043253	0	0	1	4.14825e-11	2	8.2965e-11	0	0	0	0	0	0	0	0	1	3.22185e-11	0.5	31038087	1000	31038087000	9.66554e-11	3.22185e-11		6931534000	24106553000
QS84	38.1	12101096	3480491	3468635	12078008	0	0	0	0	0	0	0	0	0	0	0	0	0	0	0	0		31128230	1000	31128230000	0	0		6949126000	24179104000
Mutation rate						3	2.39949e-11	1	2.29875e-12	7	1.60913e-11	2	1.59966e-11	1	2.29875e-12	1	7.99831e-12	2	3.57114e-12	9	1.60701e-11	0.363636				2.67836e-11	1.96413e-11		3.99916e-11	4.5975e-12
Lower limit							1.08172e-12		0		4.59738e-12		0		5.81998e-14		7.99745e-12		4.32482e-13		7.14333e-12					1.42803e-11	1.07099e-11
Upper limit							5.5995e-11		9.2005e-12		3.4218e-11		4.79946e-11		1.28078e-11		5.71833e-11		1.0716e-11		2.85744e-11					4.82152e-11	3.57151e-11
SEM**							1.30112e-11		2.30458e-12		6.81224e-12		1.09737e-11		2.29835e-12		8.00773e-12		2.44973e-12		5.35613e-12					8.72074e-12	6.43679e-12		1.19009e-11	2.26835e-12
overall mut rate						7	1.90584e-11	4	3.53252e-12	14	1.23638e-11	9	2.45037e-11	1	8.83131e-13	2	5.44526e-12	14	9.33566e-12	60	4.001e-11	0.423077				2.46728e-11	4.93456e-11		4.35621e-11	4.41565e-12
Lower limit							7.84889e-12		8.51797e-13		5.79782e-12		1.31302e-11		2.23589e-14		7.84436e-12		4.88025e-12		2.66395e-11					1.58376e-11	3.19801e-11		2.48995e-11	1.43375e-12
Upper limit							3.32332e-11		7.44601e-12		2.46524e-11		4.2908e-11		4.92049e-12		3.5285e-11		1.5903e-11		5.79745e-11					3.60132e-11	6.96287e-11		7.07421e-11	1.03047e-11
SEM**							7.48024e-12		1.69085e-12		4.49145e-12		7.46572e-12		1.11811e-12		4.3202e-12		2.59375e-12		7.00925e-12					5.36968e-12	8.59552e-12		7.4224e-12	1.43675e-12
* Ts/Tv is the transition/transversion ratio.
** SEM is the standart error.

## Sheet: S2
Suppl. Table 2. Multinucleotide Mutations
MA Lines	Chromosome	Position	Reference	Mutant
L9	NC_007089.4	1620557	T	C
L9	NC_007089.4	1620558	C	G
L9	NC_007089.4	1620559	C	T
L15	NC_007092.3	1050744	C	CCAGT
L15	NC_007092.3	1050749	ACACT	T
L53	NC_007089.4	8149618	AACG	A
L53	NC_007089.4	8149626	AGG	A
L55	NC_007090.3	477134	A	AGT
L55	NC_007090.3	477140	TATTG	T
L55	NC_007090.3	2435563	C	T
L55	NC_007090.3	2435567	A	T
L55	NC_007090.3	2435573	A	T
L55	NC_007090.3	2435585	T	A
L55	NC_007090.3	2435587	A	T

## Sheet: S3
Suppl. Table 3. Indel details
MA Lines	Chromosome	Position	Reference	Indels	Size	Genic region	Gene	SSR
L50	NC_007087.3	858811	CTCTTGAAACTGGATTT	C	-16	Coding	hypothetical	-
L52	NC_007087.3	1354998	AATTAACAATTTG	A	-12	Coding	hypothetical	4a
L14	NC_007087.3	1486790	CGATAAG	C	-6	Noncoding	-	-
L50	NC_007087.3	1669625	AGATTTCATTGATT	A	-13	Coding	ankyrin repeats	-
L21	NC_007087.3	1788422	TTATTAGTGAAAGAA	T	-14	Noncoding	-	-
L11	NC_007087.3	2697162	GAATTTTTCTAA	G	-11	Noncoding	-	-
L15	NC_007087.3	3245065	TGTGATTCTTTTCATGTTGAGAC	T	-22	Coding	katE	-
L55	NC_007087.3	3405104	C	CTCTCAG	6	Coding	hypothetical	-
L53	NC_007088.5	196920	AATTGTTTT	A	-8	Coding	abcA7	-
L9	NC_007088.5	217587	A	ATGT	3	Coding	cnxA	-
L9	NC_007088.5	217590	C	CTGA	3	Coding	cnxA	-
L23	NC_007088.5	335572	GTTTCGATTGTTTTAAATCAGA	G	-21	Coding	hypothetical	3t
L53	NC_007088.5	664131	GTAATCGTAATAA	G	-12	Noncoding	-	-
L3	NC_007088.5	698516	GAT	G	-2	Coding	hypothetical	-
L55	NC_007088.5	731170	C	CTCTTTAA	7	Coding		-
L15	NC_007088.5	841883	GTTAATTGTAAATT	G	-13	Noncoding	-	-
L25	NC_007088.5	1292114	GATA	G	-3	Coding	hypothetical	-
L55	NC_007088.5	1523287	CAATGTATAAA	C	-10	Coding	gnt5	-
L55	NC_007088.5	3953104	A	AAAC	3	Coding	hypothetical	5a
L54	NC_007088.5	3957824	AATGATGATGATG	A	-12	Coding	ddx52	9atg
L52	NC_007088.5	4399869	AATTTCATCAAAG	A	-12	Noncoding	-	3a
L54	NC_007088.5	4621622	AATTTGTGGAAGT	A	-12	Coding	hypothetical	-
L15	NC_007088.5	4869215	AATT	A	-3	Coding	cand1	-
L54	NC_007088.5	5023484	GAT	G	-2	Noncoding	-	-
L23	NC_007088.5	5429754	CAT	C	-2	Coding	hnRNP-L_PTB	-
L54	NC_007088.5	7253166	TTTAAGTGA	T	-8	Noncoding	-	4t
L3	NC_007088.5	7768344	A	ATAG	3	Coding		-
L21	NC_007088.5	7936323	TAAAAATTTTGGTTTC	T	-15	Noncoding	-	5a
L9	NC_007088.5	8140094	A	AGCTGAAAAAC	10	Coding	hypothetical	-
L53	NC_007088.5	8149618	AACGAT	A	-5	Coding	PLN02312	-
L53	NC_007088.5	8149626	AGG	A	-3	Coding	PLN02312	-
L55	NC_007088.5	8220255	GAATTAA	G	-6	Coding	hypothetical	-
L11	NC_007089.4	428467	GTAATAATAACGATAATAACAA	G	-21	Coding	hypothetical	3taa
L15	NC_007089.4	625492	ACAGATTGTCAATCAAATTTAAAAAATC	A	-27	Coding	CRD_FZ	-
L54	NC_007089.4	827922	GTTGTAGATC	G	-9	Coding	hypothetical	-
L9	NC_007089.4	1092901	TTGGA	T	-4	Coding	hypothetical	3t
L15	NC_007089.4	1577974	TAAAAAC	T	-6	Noncoding	-	5a
L3	NC_007089.4	3004280	AT	A	-1	Coding	hypothetical	-
L15	NC_007089.4	3102034	AGTT	A	-3	Noncoding	-	-
L55	NC_007089.4	4367208	AAAAT	A	-4	Noncoding	-	4a
L50	NC_007089.4	5902905	CTAAGGCGTTCTCT	C	-13	Coding	tRNA-Ser	-
L14	NC_007089.4	6134177	TATAATCATAATTA	T	-13	Coding	hypothetical	-
L9	NC_007089.4	6250662	TTAACAACTC	T	-9	Coding	hypothetical	3t
L54	NC_007090.3	372171	A	AGACTGATT	8	Coding	tgrl3	-
L55	NC_007090.3	477134	A	AGT	2	Coding	hypothetical	-
L55	NC_007090.3	477140	TATTGAA	T	-6	Coding	hypothetical	-
L53	NC_007090.3	3920851	AAATTGCTC	A	-8	Noncoding	-	3a
L3	NC_007090.3	4298118	TTTA	T	-3	Coding	hypothetical	3t
L15	NC_007090.3	4481992	AATCAGATGGTGAAATT	A	-16	Coding	hypothetical	4a
L1	NC_007090.3	4598383	A	AC	1	Noncoding	-	6c
L9	NC_007090.3	4682884	CATTGACGAAAAA	C	-12	Coding	tRNA-Ala	-
L25	NC_007091.3	1592816	TAAGTGTTTCC	T	-10	Noncoding	-	-
L3	NC_007091.3	1744990	CATTTAACAGAT	C	-11	Coding	FERM_f0	-
L17	NC_007091.3	4306112	TTAAAAGAA	T	-8	Coding	hypothetical	-
L15	NC_007091.3	4638782	CATGG	C	-4	Coding	Dnase II	-
L56	NC_007092.3	77916	TACAACA	T	-6	Coding	med14	22aca
L55	NC_007092.3	678372	CTATCATCATGAT	C	-12	Coding	hypothetical	-
L15	NC_007092.3	1050744	C	CCAGTG	5	Noncoding	-	-
L15	NC_007092.3	1050749	ACACT	A	-4	Noncoding	-	-
L15	NC_007092.3	1129665	AGATTT	A	-5	Coding	tRNA-Ser	-
L53	NC_007092.3	1199565	C	CCACAAT	6	Coding	hypothetical	11cacaat
L50	NC_007092.3	1222813	TTCATCAATATCATAAGAA	T	-18	Coding	cnrK	-
L9	NC_007092.3	2394445	TGATGTTGA	T	-8	Coding	TPR_12	-
Q10	NC_007087.3	2361807	AAAAATAAT	A	-8	Noncoding	-	5a
Q70	NC_007087.3	3987721	TAATAAG	T	-6	Coding	tbcE	3aataataag
Q54	NC_007088.5	8320361	CAT	C	-2	Coding	hypothetical	-
Q50	NC_007089.4	1703982	C	CT	1	Noncoding	-	4t
Q30	NC_007089.4	2700521	TA	T	-1	Noncoding	-	8a
Q50	NC_007089.4	4457973	TGGTAATAAAAATTTAGTATTTTTTGAATTG	T	-30	Noncoding	-	-
Q60	NC_007089.4	4627225	AGATTCT	A	-6	Noncoding	-	-
Q50	NC_007089.4	5981894	AT	A	-1	Noncoding	-	4t
Q74	NC_007090.3	3634822	ATTTGAT	A	-6	Coding	hypothetical	3t
Q54	NC_007091.3	560783	GA	G	-1	Noncoding	-	-
Q14	NC_007091.3	2633649	A	AG	1	Noncoding	-	-

## Sheet: S4
Suppl. Table 4. Base substitution details
MA Lines	Chromosome:Position	Mutation	Genic region*	Codon change	Amino acid change	nonsyn/syn**	SSR
L1	NC_007089.4:2156812	C>T	Noncoding	-	-	-	-
L3	NC_007087.3:1618481	C>T	Noncoding	-	-	-	-
L9	NC_007087.3:3404255	G>T	Coding	ACA>AAA	T>K	nonsyn	3tgt
L9	NC_007089.4:1620557	T>C	Coding	AAT>AAC	N>N	syn	-
L9	NC_007089.4:1620558	C>G	Coding	CCT>GCT	P>A	nonsyn	-
L9	NC_007089.4:1620559	C>T	Coding	CCT>CTT	P>F	nonsyn	-
L9	NC_007089.4:3021645	C>A	Coding	TGG>TTG	G>V	nonsyn	5c
L11	NC_007087.3:2398412	G>T	Noncoding	-	-	-	3g
L15	NC_007090.3:311983	G>T	Coding	GAT>TAT	D>Y	nonsyn	-
L16	NC_007091.3:4175933	G>T	Coding	GAT>TAT	D>Y	nonsyn	-
L20	NC_007090.3:1243509	T>C	Coding	ATT>ATC	I>I	syn	-
L23	NC_007090.3:3616218	T>A	Coding	CTA>CAA	L>N	nonsyn	-
L25	NC_007089.4:3643568	A>G	Noncoding	-	-	-	-
L25	NC_007091.3:1592828	A>T	Noncoding	-	-	-	-
L50	NC_007089.4:1138694	G>T	Coding	CCA>CAA	T>N	nonsyn	-
L52	NC_007089.4:5706554	G>T	Noncoding	-	-	-	-
L54	NC_007089.4:5680068	T>A	Noncoding	-	-	-	4t
L55	NC_007090.3:2435563	C>T	Coding	TTG>TTA	V>I	nonsyn	-
L55	NC_007090.3:2435567	A>T	Coding	TAA>AAA	N>K	nonsyn	3t
L55	NC_007090.3:2435573	A>T	Coding	TTT>ATT	F>L	nonsyn	3a
L55	NC_007090.3:2435585	T>A	Coding	ATT>TTT	L>F	nonsyn	-
L55	NC_007090.3:2435587	A>T	Coding	ATT>ATA	L>I	nonsyn	-
Q4	NC_007089.4:2342921	A>T	Noncoding	-	-	-	3ta
Q14	NC_007090.3:3560377	G>T	Coding	CAA>AAA	N>K	nonsyn	5t
Q14	NC_007091.3:4979058	C>T	Coding	TGA>TAA	S>N	nonsyn	-
Q14	NC_007088.5:5691670	A>T	Coding	TTT>TAT	F>Y	nonsyn	3a
Q20	NC_007087.3:797941	A>T	Noncoding	-	-	-	7t
Q20	NC_007088.5:928240	A>T	Noncoding	-	-	-	7t
Q24	NC_007088.5:7038437	A>T	Coding	TCA>ACA	T>T	syn	-
Q24	NC_007089.4:2523029	C>T	Coding	ATG>ATA	V>I	nonsyn	-
Q24	NC_007090.3:4242403	C>A	Coding	CCA>ACA	P>T	nonsyn	-
Q30	NC_007090.3:758302	C>G	Coding	CTT>GTT	L>V	nonsyn	-
Q54	NC_007088.5:657912	C>T	Noncoding	-	-	-	-
Q64	NC_007088.5:7401114	T>G	Coding	AAA>AAC	K>N	nonsyn	-
Q74	NC_007088.5:851600	A>T	Coding	TCA>TCT	S>S	syn	-
Q74	NC_007090.3:342587	T>C	Coding	ATT>GTT	L>V	nonsyn	-
Q74	NC_007091.3:2392776	T>A	Noncoding	-	-	-	9t
*Noncoding - noncoding sequence, Coding - coding sequence. ** syn - synonymous, nonsyn - nonsynonymous.
